# Supplementary material
Source: Springer Nature journal article supplement (https://www.springermedizin.de/resource/supplementary/12889_2014_7199_MOESM7_ESM.pdf/9497078)

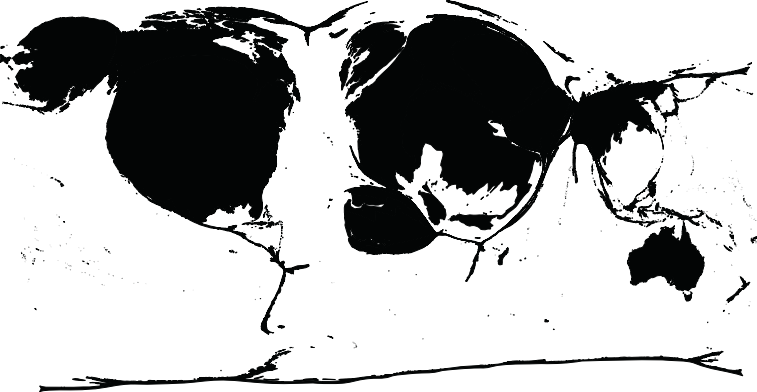

Supplement: MOESM7 [file 9497078]
